# Supplementary material
Source: Springer Nature journal article supplement (https://www.springermedizin.de/resource/supplementary/12967_2009_444_MOESM1_ESM.pdf/9576544)

# Translational Medicine Continuum

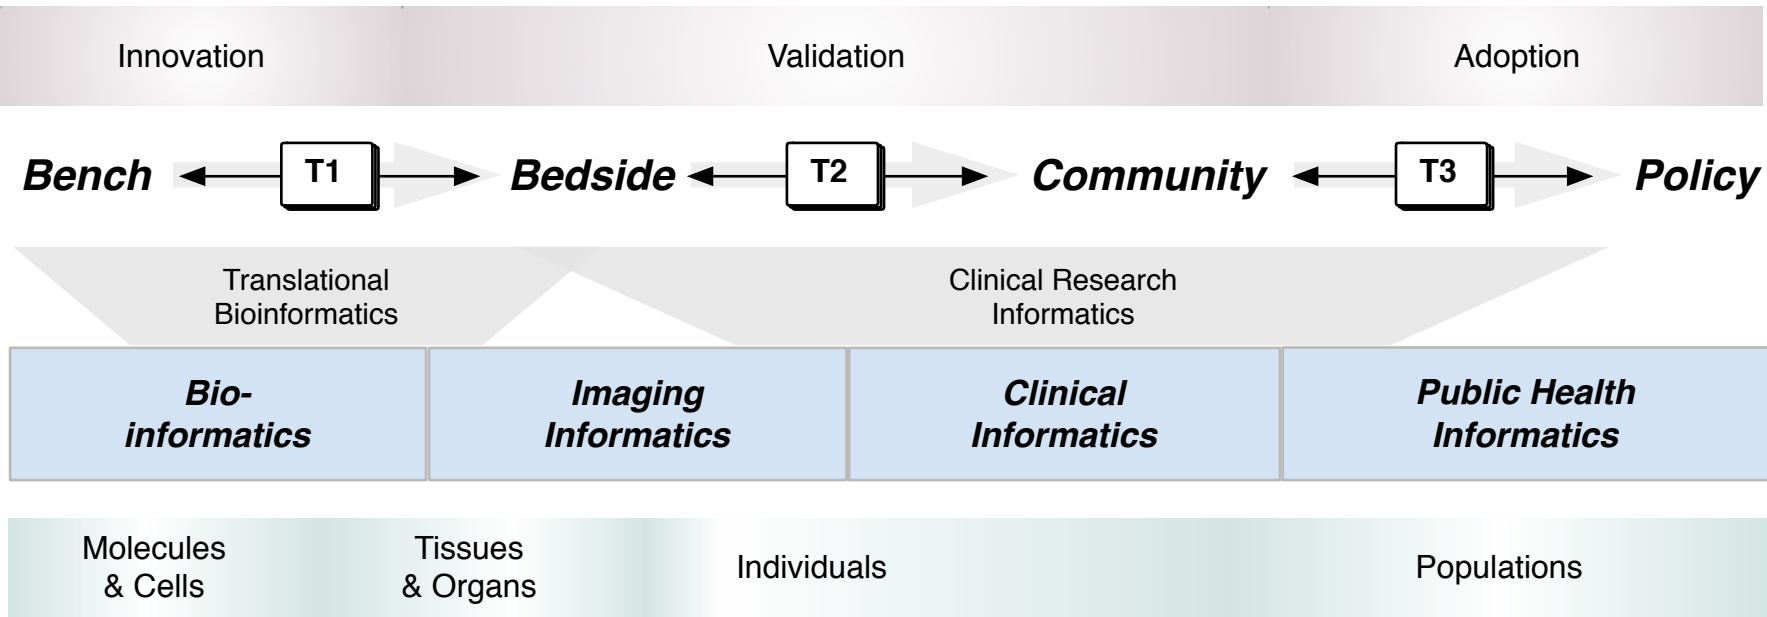

# Biomedical Informatics Continuum

Supplement: MOESM1 [file 9576544]
